# Supplementary material for: Distribution and Genetic Diversity of Hepatitis E Virus in Wild and Domestic Rabbits in Australia
Source: MDPI journal article supplement (doi:10.3390/pathogens10121637), 2021-12-17

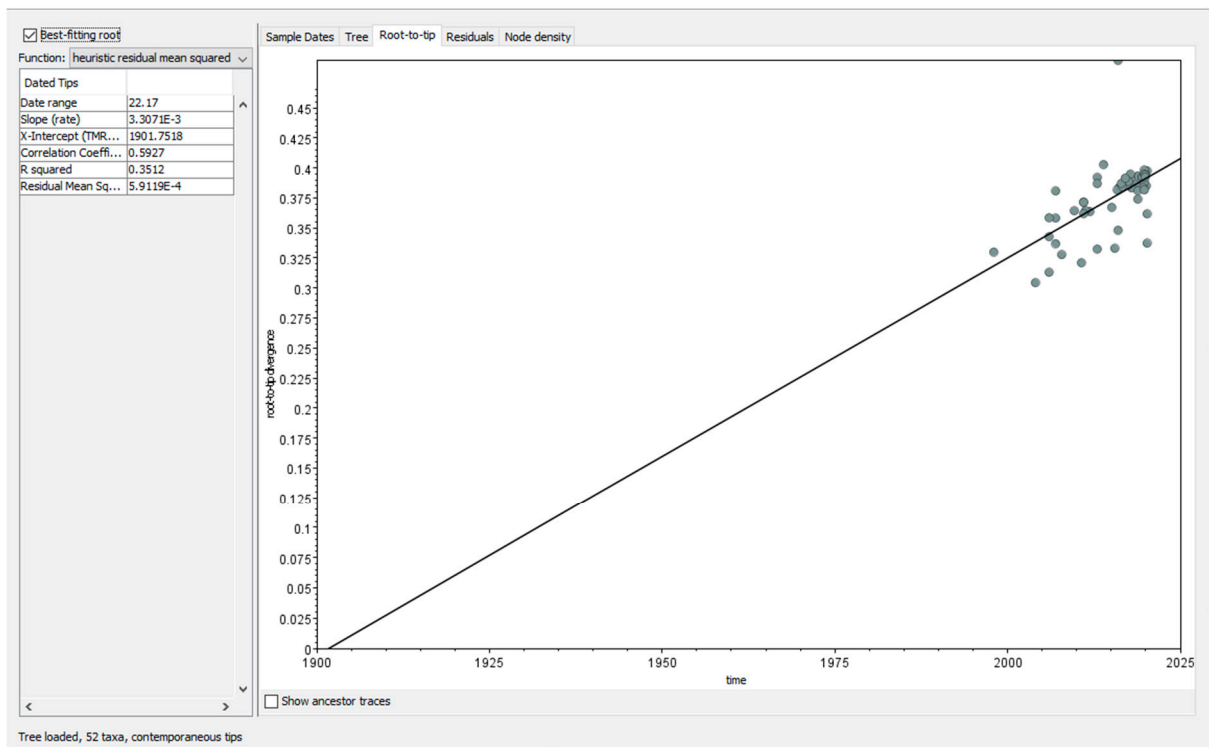

**Supplement Figure S1:** Linear regression of the root-to-tip distance of whole-genome HEV sequences against sampling time used for subsequent BEAST analyses.

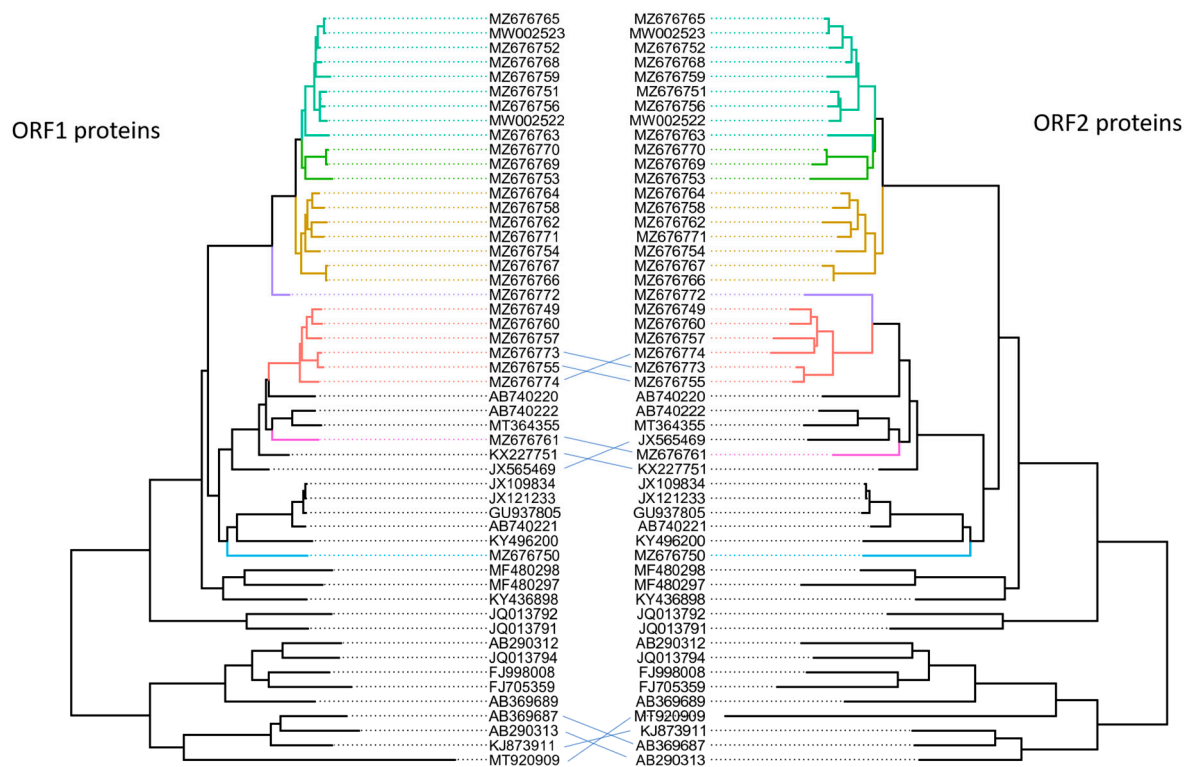

Supplement: s1 [file s1]
