# Supplementary material for: Distribution and Genetic Diversity of Hepatitis E Virus in Wild and Domestic Rabbits in Australia
Source: Pathogens. 2021 Dec 17;10(12):1637. doi: 10.3390/pathogens10121637 (PMC8709427; doi:10.3390/pathogens10121637)
Supplement: Supplementary file 1 [file pathogens-10-01637-s001.zip]

Archive with 5 entries (5 files):
- pathogens-1497175-supplementary tableS1.xlsx
- pathogens-1497175-supplementary tableS2.xlsx
- pathogens-1497175-supplementary tableS3.xlsx
- pathogens-1497175-supplementary tableS4.xlsx
- pathogens-1497175-supplementary.pdf
