# Supplementary material for: Distribution and Genetic Diversity of Hepatitis E Virus in Wild and Domestic Rabbits in Australia
Source: Pathogens. 2021 Dec 17;10(12):1637. doi: 10.3390/pathogens10121637 (PMC8709427; doi:10.3390/pathogens10121637)
Supplement: Supplementary file 1 [file pathogens-10-01637-s001.zip › pathogens-1497175-supplementary tableS1.xlsx]

## Sheet: Sheet1
Table S1: Summary of sequenced samples
sample	sample year	State	RHDV diagnostic	tissue	rabbit use	ct-value	# raw reads	# trimmed reads	# of HepE reads	Acc. #	% coverage reference	mean coverage
ART-4	2020	NSW	Negative	Liver	Domestic	22.8	24331077	19790876	87	MZ676752	74.2	1.5
BDW-2	2019	SA	RHDV	Liver	Domestic	23.85	18573674	14715350	926	MZ676755	97.4	16.8
BER-1	2013	NSW	RHDV	Liver	Domestic	28	28571730	24147560	283	MZ676753	95.5	5
BER-2	2013	NSW	RHDV	Liver	Domestic	35.35	24769704	20205388	2	n.a	2.4	0
BG-6	2016	NSW	RHDV	Liver	Wild	37.18	22633361	18314543	2	n.a	4.6	0
BON-3	2016	ACT	RHDV	Liver	Domestic	34.82	20870195	17231704	11	n.a	13.2	0.2
BTY-1	2017	NSW	Negative	Liver	Domestic	26.5	7928152	6356968	1945	MZ676754	99.9	33.6
CFT-2	2018	VIC	RHDV	Liver	Domestic	37.2	25704148	21174208	2	n.a	2.3	0
CGW-1	2017	VIC	RHDV	Liver	Domestic	26.07	20597118	16319248	769	MZ676760	97.6	13.6
CGW-34	2018	VIC	Negative	Liver	Domestic	22.22	22638089	17974684	212	MZ676761	82.6	3.5
CGW-40	2019	VIC	Negative	Liver	Domestic	26.25	21435445	17549295	7	n.a	10.3	0.1
CND-2	2018	NSW	Negative	Liver	Domestic	33.885	15768061	12832720	85	n.a	56.9	2.7
COR-1	2019	VIC	RHDV	Liver	Domestic	28.54	15012410	12252795	14	n.a	19	0.2
COR-10	2019	VIC	RHDV	Liver	Domestic	38.48	14842714	12188253	15	n.a	20.4	0.3
COR-5	2019	VIC	Negative	Liver	Domestic	31.02	20137139	16704222	4	n.a	6.8	0
COR-6	2019	VIC	RHDV	Liver	Domestic	25.2	21630760	16715424	685	MZ676762	99.7	11.9
COR-8	2019	VIC	RHDV	Liver	Domestic	27.72	16021281	12146800	762	MZ676763	99.7	13.5
DRY-7	2018	VIC	Negative	Bone marrow	Unknown	41.74	13919862	10747167	16	n.a	25.3	0.3
DUR-1	2019	NSW	Negative	Liver	Domestic	37.98	21915060	18304671	2	n.a	3.7	0
GAW-1	2017	SA	Negative	Liver	Domestic	22.5	19898979	15584234	5470	MZ676756	99.8	96.7
GLO-1	2015	NSW	RHDV	Liver	Domestic	24.96	9116637	7129143	7597	MZ676764	99.7	131.5
GRL-1	2016	ACT	Negative	Liver	Domestic	20.47	24380325	18938369	811	MZ676749	95.1	13.3
HHD-2	2018	WA	RHDV	Liver	Domestic	22.84	8781846	7102038	1735	MZ676773	99.4	31
HTL-11	2019	VIC	Negative	Liver	Domestic	20.29	29168042	22999560	5868	MZ676765	99.8	94.1
HUG-2	2020	ACT	Negative	Liver	Domestic	19.77	22083685	17232288	6730	MZ676750	99.8	120.3
KAN-4	2017	VIC	Negative	Liver	Unknown	22.85	16154323	13330843	1	n.a	1.9	0
KERANG-2	2015	VIC	RHDV	Liver	Wild	38.25	24116921	19743544	9	n.a	15.2	0.2
KLW-17	2019	VIC	Negative	Liver	Wild	37.45	22738441	18535106	8	n.a	14.5	0.2
LGR-1	2018	QLD	Negative	Bone marrow	Unknown	21.61	9483027	7437146	1	n.a	2.1	0
MAJ-2	2016	ACT	Negative	Other	Hare	36.66	891681	460333	9	n.a	15.1	0.2
MCH-2	2017	NSW	RHDV	Liver	Unknown	20.52	25831501	21305277	10	n.a	18.2	0.2
MTBA-3	2019	SA	RHDV	Bone marrow	Wild	20.79	21039516	16917742	5	n.a	4.6	0
MTPL-3	2017	VIC	RHDV	Liver	Domestic	26.47	21493142	17357037	221	MZ676766	92.7	3.8
MTPL-6	2017	VIC	RHDV	Liver	Domestic	24.35	17394016	14302493	50	MZ676767	47.4	0.9
MTPL-7	2018	VIC	RHDV	Liver	Domestic	33.16	22002560	18208123	14	n.a	18.9	0.2
NBD-3	2019	ACT	Negative	Liver	Domestic	21.39	18210933	15123177	73	MZ676751	61.6	1.2
OCO-1	2019	ACT	RHDV	Liver	Domestic	34.5	18385029	15271546	19	n.a	26.8	0.3
PKV-2	2018	VIC	RHDV	Liver	Domestic	29.5	27203445	22334950	26	n.a	25.3	0.4
SRL-1	2017	TAS	Negative	Liver	Domestic	21.07	21029882	17080551	787	MZ676757	95.5	12.3
THO-3	2016	VIC	RHDV	Liver	Domestic	25.25	20850965	17247140	1239	MZ676768	99.6	21.2
TIM-5	2019	VIC	RHDV	Liver	Domestic	28.21	16566313	13020971	191	MZ676769	95.9	3.6
TIM-6	2019	VIC	RHDV	Liver	Domestic	25.32	21447018	17489786	86	MZ676770	65	1.3
UST-4	2019	TAS	Negative	Liver	Domestic	22.19	24996604	20281723	1404	MZ676758	99.7	24
UST-5	2019	TAS	Negative	Liver	Domestic	36.29	13098913	10757770	21	n.a	23.1	0.3
UST-7	2020	TAS	RHDV	Liver	Domestic	26.27	20318513	16614425	1875	MZ676759	99.6	33
WA-1	2016	WA	RHDV	Liver	Unknown	29.08	20618831	16885373	1037	MZ676774	93	18.5
WLG-1	2018	VIC	Negative	Liver	Domestic	27	19717924	16349268	83	MZ676771	73.3	1.4
WTN-9	2020	VIC	RHDV	Liver	Domestic	26.74	21088605	17374102	32	MZ676772	39	0.6
