# Supplementary material for: Distribution and Genetic Diversity of Hepatitis E Virus in Wild and Domestic Rabbits in Australia
Source: Pathogens. 2021 Dec 17;10(12):1637. doi: 10.3390/pathogens10121637 (PMC8709427; doi:10.3390/pathogens10121637)
Supplement: Supplementary file 1 [file pathogens-10-01637-s001.zip › pathogens-1497175-supplementary tableS2.xlsx]

## Sheet: Primer sequences
Table S2: Primers used for Primalscheme assays
name	pool	seq (5'-3')	size	%gc	tm (use 65)	Sequences amplified with primerset
HepE-clade1_1_LEFT	1	CAATTCTGCCTTGGCGAATGC	21	52.38	61.17	MZ676755
HepE-clade1_1_RIGHT	1	TGCAGCTAGAGAATCCGTCAAA	22	45.45	59.95	MZ676773
HepE-clade1_2_LEFT	2	TGTTCAGCGGTGGTATTCCG	20	55	60.41	MZ676774
HepE-clade1_2_RIGHT	2	GGGTGTTCGCCGATGATTTTTG	22	50	61.16	MZ676757
HepE-clade1_3_LEFT	1	TCGTAACCTATGAGGGTGACACT	23	47.83	60.82	MZ676760
HepE-clade1_3_RIGHT	1	GGGTGCCCACAGTGACCTTATA	22	54.55	61.94	MZ676749
HepE-clade1_4_LEFT	2	GGGATAGGCTCATGCTCTTTGG	22	54.55	61
HepE-clade1_4_RIGHT	2	GCACAGACTCATCAAAGACAAGC	23	47.83	60.61
HepE-clade1_5_LEFT	1	GCCGCCATCTTCAGTTTTATGC	22	50	60.97
HepE-clade1_5_RIGHT	1	AAGCTCGACTGTAGCCGACAAA	22	50	62.41
HepE-clade1_6_LEFT	2	TTGGTGGACCTATACAAAGCACT	23	43.48	59.93
HepE-clade1_6_RIGHT	2	CCGCTGAGTGGTTCTGTTGTAT	22	50	60.79
HepE-clade1_7_LEFT	1	CGGATTATGGTTACACCCGGAG	22	54.55	60.73
HepE-clade1_7_RIGHT	1	ACCAACCAGTCACAGTCTGAC	21	52.38	59.96
HepE-clade1_8_LEFT	2	TCCTTGTTTGAGTCAGACTGTGA	23	43.48	59.8
HepE-clade1_8_RIGHT	2	TTGGCCTCAAACCAAGCTGTC	21	52.38	61.47
HepE-clade1_9_LEFT	1	TTTCGACGCTTGGGAACGAAA	21	47.62	61.17
HepE-clade1_9_RIGHT	1	GGCACAACCACAACATCAACA	21	47.62	59.97
HepE-clade1_10_LEFT	2	CCCTGGGGTAGTCCACTATCAA	22	54.55	60.82
HepE-clade1_10_RIGHT	2	CCACGTATAAGTTCGCAGACGT	22	50	60.91
HepE-clade1_11_LEFT	1	TGGCTTAGTCACCGCAATCC	20	55	60.41
HepE-clade1_11_RIGHT	1	AGAAATTATTAACTATCACATCCGATATACCC	32	31.25	60.35
HepE-clade1_12_LEFT	2	TTATTCAGTCGTCCCGGGCA	20	55	61.28
HepE-clade1_12_RIGHT	2	CGGCAGTGGACTATGTCAGTTA	22	50	60.01
HepE-clade1_13_LEFT	1	GTTTTACCACCCTGCCCTGA	20	55	59.91
HepE-clade1_13_RIGHT	1	ATCGTCTCCCCGGTTGTAAACT	22	50	61.6
HepE-clade1_14_LEFT	2	CTGTGCTCGAGCTTGACCTTT	21	52.38	60.98
HepE-clade1_14_RIGHT	2	ACGAGGTGATACAATCTGACTAACC	25	44	60.54
HepE-clade1_15_LEFT	1	TCGGAGTTTGACAGTACCCAGA	22	50	60.94
HepE-clade1_15_RIGHT	1	CAACCACAACTCCGGCGTAA	20	55	60.9
HepE-clade1_16_LEFT	2	ACGACTCGGTGGTTCTTTGTAG	22	50	60.47
HepE-clade1_16_RIGHT	2	ACACAGGCTTCACAGTTTCAGT	22	45.45	60.54
HepE-clade1_17_LEFT	1	TCTCGTGTGTATGGGGTGAGTC	22	54.55	61.65
HepE-clade1_17_RIGHT	1	ATTTGGCTCCAGACCCGGAA	20	55	61.51
HepE-clade1_18_LEFT	2	CCTTCGCCCTCCCCTATTTTCA	22	54.55	62.27
HepE-clade1_18_RIGHT	2	CTTCAGTCGCCATAATGTGGGT	22	50	60.86
HepE-clade1_19_LEFT	1	CCTCAACTGTTGCCTCAGGTAC	22	54.55	61.05
HepE-clade1_19_RIGHT	1	GCATAACAAGTCCTGAAGTGGC	22	50	60.02
HepE-clade1_20_LEFT	2	ACCTAGTGAGCGTCTCCACTAC	22	54.55	61.12
HepE-clade1_20_RIGHT	2	AGCTATGTTGAACAGCGTCAGG	22	50	61.11
HepE-clade1_21_LEFT	1	CTTACAACTACTGCGGCCACAC	22	54.55	61.93
HepE-clade1_21_RIGHT	1	AATGAGACCCACAACACATCGT	22	45.45	60.41
HepE-clade1_22_LEFT	2	TCCCGTGTAGTTATCCAGGACT	22	50	60.21
HepE-clade1_22_RIGHT	2	TATCAGGATCTGATCGCTGGCT	22	50	61.01
HepE-clade1_23_LEFT	1	CAGACTACATATGGTTCGTCGACT	24	45.83	60.28
HepE-clade1_23_RIGHT	1	TCAACAGTATCCTCAAGAACAGCT	24	41.67	60.04
HepE-clade2_1_LEFT	1	TTAAGGCTCCTGGCATCACAAC	22	50	61.06	MZ676766
HepE-clade2_1_RIGHT	1	CAGCGGGCCACAAATCATGTA	21	52.38	61.39	MZ676767
HepE-clade2_2_LEFT	2	ATGTCCTCCACCGGTGCTTT	20	55	61.8	MZ676754
HepE-clade2_2_RIGHT	2	GGCAGCAGTAAGCAACAGTACA	22	50	61.31	MZ676771
HepE-clade2_3_LEFT	1	GACGAAAATTGTCGGCGACCA	21	52.38	61.89	MZ676762
HepE-clade2_3_RIGHT	1	AAACTTTTGGGCATGCTCAAGC	22	45.45	60.99	MZ676758
HepE-clade2_4_LEFT	2	CCGCGGCTTACCTTACCATTT	21	52.38	61.12	MZ676764
HepE-clade2_4_RIGHT	2	AGTGCTCTATATAGGTCCGCCA	22	50	60.41
HepE-clade2_5_LEFT	1	CAATGAGGCTTATGAGGGGTCC	22	54.55	60.67
HepE-clade2_5_RIGHT	1	CATAGCCCACCAACAAGTGAGT	22	50	60.74
HepE-clade2_6_LEFT	2	CTAATGGCTTGGACTGTACGGC	22	54.55	61.49
HepE-clade2_6_RIGHT	2	ATCTGACTCAAACAAGGACCCC	22	50	60.14
HepE-clade2_7_LEFT	1	GATGTGCCTGAGCCTCTTTCAC	22	54.55	61.69
HepE-clade2_7_RIGHT	1	GCCTATTAGCCTCAAACCAAGC	22	50	59.82
HepE-clade2_8_LEFT	2	CTTCGATGCCTGGGAACGAAA	21	52.38	61.05
HepE-clade2_8_RIGHT	2	TCATCTATTACAACACGCCGGC	22	50	61.23
HepE-clade2_9_LEFT	1	ATGTCGTGGTTGTGCCTACC	20	55	60.34
HepE-clade2_9_RIGHT	1	CTGGATAAGCCCTCTAGCGTCA	22	54.55	61.52
HepE-clade2_10_LEFT	2	AAGTTGGTTTTTACGCAGGCTG	22	45.45	60.4
HepE-clade2_10_RIGHT	2	ACGTCAGTCAGCTCAAAAACCA	22	45.45	60.86
HepE-clade2_11_LEFT	1	TACCATCAGCTAGCCGAGGA	20	55	59.83
HepE-clade2_11_RIGHT	1	TCTTGCTCCATGCTGATATTCCC	23	47.83	60.75
HepE-clade2_12_LEFT	2	GAGATGTGTCCCGAATAACGTTTT	24	41.67	59.92
HepE-clade2_12_RIGHT	2	AACCTTGAAATCGCGGAACTCA	22	45.45	60.99
HepE-clade2_13_LEFT	1	AGGCTTTTGGAAGAAGCACTCC	22	50	61.26
HepE-clade2_13_RIGHT	1	AGACAGGCTTTACAGTTTCGGT	22	45.45	60.08
HepE-clade2_14_LEFT	2	CGGTCGGTTGTCGGAAAAGAA	21	52.38	61.24
HepE-clade2_14_RIGHT	2	CGAAGGGGTTGGTTGGATGAAA	22	50	61.26
HepE-clade2_15_LEFT	1	TCGTGTTTCTGCCTATGTTGCC	22	50	61.63
HepE-clade2_15_RIGHT	1	ATAATTAGATGCCTCAGTCGCCA	23	43.48	59.93
HepE-clade2_16_LEFT	2	ATCTTGTCTTGTATGCCGCACC	22	50	61.44
HepE-clade2_16_RIGHT	2	CCCTGGGGTCAAATTCCTAAACT	23	47.83	60.51
HepE-clade2_17_LEFT	1	TCTCCCGTGAACTCATACACCA	22	50	61
HepE-clade2_17_RIGHT	1	CGGTCCTGCTCGTGTTGATTAT	22	50	60.92
HepE-clade2_18_LEFT	2	CGAGAATGCACAGCAGGACAAG	22	54.55	62.24
HepE-clade2_18_RIGHT	2	CGCCCAAGCTGGTAGTATAGGT	22	54.55	61.79
HepE-clade2_19_LEFT	1	CTGTTGCTCGCTCTTTTGACTG	22	50	60.52
HepE-clade2_19_RIGHT	1	GCAACAAAGAAGGAAGGCACAG	22	50	60.72
HepE-clade3_1_LEFT	1	TTAAGGCTCCTGGCATCACAAC	22	50	61.06	MZ676753
HepE-clade3_1_RIGHT	1	ACATCAGCAGGCCACAAATCAT	22	45.45	61.07	MZ676769
HepE-clade3_2_LEFT	2	ATTGCTTTGATGGGTTCTCCGG	22	50	61.39	MZ676770
HepE-clade3_2_RIGHT	2	GTAGACTTTGTGGAGCAGGCTG	22	54.55	61.37
HepE-clade3_3_LEFT	1	ATGTTCCTTTTCCCCGCTCAAC	22	50	61.58
HepE-clade3_3_RIGHT	1	TAGGGTCCAAATGAAAGCCGG	21	52.38	60.44
HepE-clade3_4_LEFT	2	TTTCTAAAGGTATGCGCCGGTT	22	45.45	60.8
HepE-clade3_4_RIGHT	2	GGTAAGCTCGACAGTTGCTGA	21	52.38	60.44
HepE-clade3_5_LEFT	1	GCAACTGTTGGCGGACCTATAT	22	50	60.93
HepE-clade3_5_RIGHT	1	GGGTTTGCAGATTCCCAGACAT	22	50	61.07
HepE-clade3_6_LEFT	2	GCTTTCTGTAGCGCCCTGTATC	22	54.55	61.55
HepE-clade3_6_RIGHT	2	CTGGGTTGGACGCATTTACCAA	22	50	61.58
HepE-clade3_7_LEFT	1	CCGCCTCCTTTTTGTTTACCCA	22	50	61.52
HepE-clade3_7_RIGHT	1	GTCTCTGTTGTGGGGCAATCAG	22	54.55	61.63
HepE-clade3_8_LEFT	2	CCACTGCTTGGTTTGAGGCTAA	22	50	61.26
HepE-clade3_8_RIGHT	2	CAAGAAGATGGACCGATGAGGC	22	54.55	61.24
HepE-clade3_9_LEFT	1	CACTCAGCTGCCCGAGTTACTA	22	54.55	61.96
HepE-clade3_9_RIGHT	1	CATTTCTCTGTATGCCGGGTGA	22	50	60.6
HepE-clade3_10_LEFT	2	GCCACATTTACAGAGACCACTGTT	24	45.83	61.6
HepE-clade3_10_RIGHT	2	CATACCTCCCAACGAGCGTT	20	55	60.12
HepE-clade3_11_LEFT	1	TGGTCTTTGAGTTGACTGACGT	22	45.45	60.01
HepE-clade3_11_RIGHT	1	TGCAGAGAACACGGAGTCCT	20	55	60.84
HepE-clade3_12_LEFT	2	GGTTTCGTGCTATCGAGAAGCA	22	50	61.17
HepE-clade3_12_RIGHT	2	AGGGCGGTAGTCAACTTTAAGC	22	50	60.8
HepE-clade3_13_LEFT	1	CAGTGGTCCTCTGTAGCGACTA	22	54.55	61.12
HepE-clade3_13_RIGHT	1	GCATAGGCAGAAACACGAGGAA	22	50	61.12
HepE-clade3_14_LEFT	2	TTGTGCAGGGGTTGGAATGAAT	22	45.45	60.95
HepE-clade3_14_RIGHT	2	CCCGTAGCAACAGTTGAAGTCA	22	50	60.99
HepE-clade3_15_LEFT	1	GCACCTGATACGGTACCTGTTC	22	54.55	60.92
HepE-clade3_15_RIGHT	1	CGGGGGAGCCATGTATACAAAG	22	54.55	60.99
HepE-clade3_16_LEFT	2	TACCAAGTGAGCGCCTCCATTA	22	50	61.66
HepE-clade3_16_RIGHT	2	ATACAACTTGACAGTCGGCTCG	22	50	60.85
HepE-clade3_17_LEFT	1	GCCGACAGAATTAATTGCGTCG	22	50	61.02
HepE-clade3_17_RIGHT	1	CAAAAAGAAAGCTTACCGCGCA	22	45.45	61.03
HepE-clade3_18_LEFT	2	GCTGTCGCTCGTTCTTTTGATT	22	45.45	60.27
HepE-clade3_18_RIGHT	2	AGCAAAGAAGGAAGGCACAGC	21	52.38	61.53
HepE-CGW-34_1_LEFT	1	CCAATTCTGCCCTGGCGAAT	20	55	61.06	MZ676761
HepE-CGW-34_1_RIGHT	1	TACAGCATACAGGCGTGACATC	22	50	60.66
HepE-CGW-34_2_LEFT	2	TTTGCGGCTGAGACTGGTATTG	22	50	61.37
HepE-CGW-34_2_RIGHT	2	TCCCAGATATGAACAGGGACGG	22	54.55	61.47
HepE-CGW-34_3_LEFT	1	CTTTGTGTTGCTGCTTACTGCC	22	50	61.04
HepE-CGW-34_3_RIGHT	1	CACTGCGCATAAAACTGGAGCT	22	50	61.94
HepE-CGW-34_4_LEFT	2	GCCCAGAAGTTTACTACCAGGC	22	54.55	61.12
HepE-CGW-34_4_RIGHT	2	AAGTTGGTACGACACTCAAGCC	22	50	60.99
HepE-CGW-34_5_LEFT	1	AAGGCCTGCTTGGTGACCAA	20	55	62.31
HepE-CGW-34_5_RIGHT	1	GTGCCGCTGAATACTCCTGTTA	22	50	60.6
HepE-CGW-34_6_LEFT	2	TAATGGCTTAGACTGCACTGCA	22	45.45	60.21
HepE-CGW-34_6_RIGHT	2	ACCTGAATAAATCTTAGCGCCGT	23	43.48	60.69
HepE-CGW-34_7_LEFT	1	CATCCAATCCTGGTCACCGT	20	55	59.76
HepE-CGW-34_7_RIGHT	1	TCCAATGCAAGATTGGCTGTCC	22	50	61.65
HepE-CGW-34_8_LEFT	2	CACCACACCCACAACTCATGA	21	52.38	60.58
HepE-CGW-34_8_RIGHT	2	TGCTCAAAGTCAATTGCAGGGA	22	45.45	60.94
HepE-CGW-34_9_LEFT	1	CATCTCTCCCGCCTCATTTGTT	22	50	60.86
HepE-CGW-34_9_RIGHT	1	ATCACATCCGATATGCCCACCT	22	50	61.55
HepE-CGW-34_10_LEFT	2	ATGCCATTGTCGCACTCACC	20	55	61.32
HepE-CGW-34_10_RIGHT	2	GGTGGGAATGAACCTTGTGAGT	22	50	60.67
HepE-CGW-34_11_LEFT	1	AGTGGTCCTTTGCAGCGACTA	21	52.38	61.81
HepE-CGW-34_11_RIGHT	1	ATAGGCAAAAACACGAGGAGCA	22	45.45	60.73
HepE-CGW-34_12_LEFT	2	TTCCATTGTGCAGAGGTTGGAA	22	45.45	60.61
HepE-CGW-34_12_RIGHT	2	AGGCGACAGTTGAGGTTAAAGG	22	50	60.73
HepE-CGW-34_13_LEFT	1	CGTTTCACCTGCACCTGACA	20	55	60.83
HepE-CGW-34_13_RIGHT	1	GCATAACAAGTCCAGAAGTGGC	22	50	60.02
HepE-CGW-34_14_LEFT	2	CGAGTGAGCGTCTCCATTATCG	22	54.55	61.09
HepE-CGW-34_14_RIGHT	2	TGTATACAACTTGACAGCCGGC	22	50	61.11
HepE-CGW-34_15_LEFT	1	ACAGAACTAATTTCGTCGGCCG	22	50	61.42
HepE-CGW-34_15_RIGHT	1	AAGGAAAGCTTGCCACGTAGAG	22	50	61.05
HepE-CGW-34_16_LEFT	2	CCCGCTCTCTTGATTGGTCTAA	22	50	60.01
HepE-CGW-34_16_RIGHT	2	GTTAGCATAGAAGGAGGGCACA	22	50	60.01
WTN-9_1_LEFT	1	CGGGTGATTGGAATACTGCCTT	22	50	60.87	MZ676772
WTN-9_1_RIGHT	1	ACATCATGGTTATAGCCGGCAC	22	50	60.99
WTN-9_2_LEFT	2	ACCTATCACACCACCTCCTACC	22	54.55	60.81
WTN-9_2_RIGHT	2	CACTGCGCATAAAACTGGAGCT	22	50	61.94
WTN-9_3_LEFT	1	CGATTTCAAAAGGTATGCGCCG	22	50	61.27
WTN-9_3_RIGHT	1	GATGAAATTTTAACCCGTAGCCCA	24	41.67	59.92
WTN-9_4_LEFT	2	CCCGAGCAGTATGTCCTCTCAT	22	54.55	61.52
WTN-9_4_RIGHT	2	GGGAAGCGCTGATAGAAAGCAT	22	50	61.25
WTN-9_5_LEFT	1	CCAGATGGCGCCAAGATTTACT	22	50	61.19
WTN-9_5_RIGHT	1	GACATCAACATCACCCTGCTGT	22	50	61.06
WTN-9_6_LEFT	2	AATTGACTCCAGGACTGAGCTG	22	50	60.21
WTN-9_6_RIGHT	2	GGGCGTCCAGAATGACACATTT	22	50	61.64
WTN-9_7_LEFT	1	CGCCACATTTACAGAGACCACT	22	50	60.79
WTN-9_7_RIGHT	1	CTGGAAAAATGTTATTCGGGACACA	25	40	60.43
WTN-9_8_LEFT	2	TATGAGCTGGTTGAGGCGATG	21	52.38	60.3
WTN-9_8_RIGHT	2	ACTTTAAGCTTGAGCCCACAGC	22	50	61.58
WTN-9_9_LEFT	1	TGAGTTCCGCGATTTCAAGGTT	22	45.45	60.99
WTN-9_9_RIGHT	1	GACACTCTTTCCCTACACGACG	22	54.55	60.84
WTN-9_10_LEFT	2	CGGTTCCAGCAGTGGTTTCT	20	55	60.55
WTN-9_10_RIGHT	2	AACAGAGCGCCAACCTTGATT	21	47.62	60.92
WTN-9_11_LEFT	1	CCAGACTACCACTACTCCCACT	22	54.55	60.48
WTN-9_11_RIGHT	1	TAGGCCGGTCTTGCTCATGTT	21	52.38	61.89
WTN-9_12_LEFT	2	GACAAGGGGATCGCAATACCTC	22	54.55	60.99
WTN-9_12_RIGHT	2	TTGCCCACCTTCATCTTAAGGC	22	50	61.07
HepE-HUG-2_1_LEFT	1	TTAAGGCTCCTGGCATCACAAC	22	50	61.06	MZ676750
HepE-HUG-2_1_RIGHT	1	GGCCACAGATCGTGTAAGGAGT	22	54.55	62.23
HepE-HUG-2_2_LEFT	2	CTCCCTCCTTCTGACCGTACTT	22	54.55	61.07
HepE-HUG-2_2_RIGHT	2	GATTTTGTAGAACACGCCGACG	22	50	60.64
HepE-HUG-2_3_LEFT	1	CATGCCCTACGTTCCATTTCCT	22	50	60.87
HepE-HUG-2_3_RIGHT	1	GAGCACTCTAGGGTCCAGATGA	22	54.55	60.87
HepE-HUG-2_4_LEFT	2	AAAGTCCGGCCGTGATTACATC	22	50	61.18
HepE-HUG-2_4_RIGHT	2	TGAGCGCCGTCCGTAATTGTA	21	52.38	62.25
HepE-HUG-2_5_LEFT	1	CTGTCAGCCACTGTTGAGCTT	21	52.38	60.92
HepE-HUG-2_5_RIGHT	1	GGCTGCATCAAATGGCAAGAAA	22	45.45	60.79
HepE-HUG-2_6_LEFT	2	CAAATCCATTCTGTGGTGAGGC	22	50	60.01
HepE-HUG-2_6_RIGHT	2	GCAACTCTGTAATCAGGGGCAA	22	50	61.06
HepE-HUG-2_7_LEFT	1	AGTTTATTATGCGGGATGGGCT	22	45.45	60.08
HepE-HUG-2_7_RIGHT	1	CTGACTGCACAACCAACACAGG	22	54.55	62.32
HepE-HUG-2_8_LEFT	2	CCCTGACCATAACGGATGATGC	22	54.55	61.31
HepE-HUG-2_8_RIGHT	2	CCCGCGTATAAGCTCACAAACA	22	50	61.43
HepE-HUG-2_9_LEFT	1	TTGAGCATGCCGGTCTTGTTC	21	52.38	61.58
HepE-HUG-2_9_RIGHT	1	AGGGTGTCAAGGTTTCGGTCA	21	52.38	61.69
HepE-HUG-2_10_LEFT	2	AATTTCTTTTTAGCCGGCGGTG	22	45.45	60.53
HepE-HUG-2_10_RIGHT	2	GTCAAGCTCGAGAACAGCTGAC	22	54.55	61.66
HepE-HUG-2_11_LEFT	1	TTATCCCTGTCATCGGCCCT	20	55	60.42
HepE-HUG-2_11_RIGHT	1	AAGACTCCTTAGGGGCCTGTAG	22	54.55	60.81
HepE-HUG-2_12_LEFT	2	GGCCTTGAGTGTGTCATTATGGA	23	47.83	60.88
HepE-HUG-2_12_RIGHT	2	CAACATCAACACAAACCTGGGC	22	50	60.98
HepE-HUG-2_13_LEFT	1	CGGTCGGCTGTCAGAAAAGAAT	22	50	61.37
HepE-HUG-2_13_RIGHT	1	GAAGGGGTTGGTTGGATGAAGA	22	50	60.41
HepE-HUG-2_14_LEFT	2	TCTTCGTGTGTTTGCCTATGCT	22	45.45	60.73
HepE-HUG-2_14_RIGHT	2	TAGACGCCTCAGTAGCCATGAT	22	50	60.94
HepE-HUG-2_15_LEFT	1	TCAGGCACTAACCTTGTCCTGT	22	50	61.48
HepE-HUG-2_15_RIGHT	1	GGAGTCAAATTCCGGAACTCGA	22	50	60.53
HepE-HUG-2_16_LEFT	2	TATACACGGCTCCCCTGTGAAT	22	50	61.14
HepE-HUG-2_16_RIGHT	2	CCGGTCCTGCTCATGTTGATTA	22	50	60.6
HepE-HUG-2_17_LEFT	1	AAAATGCACAGCAGGACAAGGG	22	50	62.11
HepE-HUG-2_17_RIGHT	1	TGTAGAGATAGCAACACGGTGG	22	50	60.01
HepE-HUG-2_18_LEFT	2	CCCGCTCTCTTGACTGGTCTAA	22	54.55	61.65
HepE-HUG-2_18_RIGHT	2	ATCAGTACAGAAGGGAGGCACA	22	50	61.01
HepE-clade4_1_LEFT	1	GAGGTTTTCTGGAATCACCCCA	22	50	60.41	MZ676763
HepE-clade4_1_RIGHT	1	ACATCATGGTTGTAGCCGGC	20	55	60.76	MZ676756
HepE-clade4_2_LEFT	2	GCCTGGATCCGCACAACAAA	20	55	61.54	MZ676751
HepE-clade4_2_RIGHT	2	GCCTGGTGATAAACTTCTGGGC	22	54.55	61.71	MZ676759
HepE-clade4_3_LEFT	1	TTTGGGATAGGCTCATGCTCTT	22	45.45	59.67	MZ676768
HepE-clade4_3_RIGHT	1	GCTCCAAGAAACAGGTGCACTC	22	54.55	62.13	MZ676752
HepE-clade4_4_LEFT	2	TGCACTGCCGTTGTAGAAGTTT	22	45.45	61.18	MZ676765
HepE-clade4_4_RIGHT	2	ATTTTAACCCGCAGCCCACC	20	55	61.27	MW002522
HepE-clade4_5_LEFT	1	CACTGTTCATGGGCAACTGTTG	22	50	60.72	MW002523
HepE-clade4_5_RIGHT	1	AAAACGGATTTGCGGACTCCC	21	52.38	61.59
HepE-clade4_6_LEFT	2	ATAGAACCATCCAGCGGCACT	21	52.38	61.69
HepE-clade4_6_RIGHT	2	AAAAGACTGAGGGAAACGCTGG	22	50	61.25
HepE-clade4_7_LEFT	1	CCTTGTTTGAGTCAGACTGCGA	22	50	60.98
HepE-clade4_7_RIGHT	1	ATCCTCTGTTATGGTCAGGGCG	22	54.55	62.05
HepE-clade4_8_LEFT	2	CAACTCATGACACAGCCTCAGC	22	54.55	61.94
HepE-clade4_8_RIGHT	2	CAAGACCGGTGTGCTCGAAA	20	55	60.89
HepE-clade4_9_LEFT	1	GCTACTACATATGCAGCGTGCT	22	50	61.04
HepE-clade4_9_RIGHT	1	ACCACCAGCTAGAAAGAAGTTATTAACT	28	35.71	61.03
HepE-clade4_10_LEFT	2	TCACCCGACACACAGAGAAATG	22	50	60.73
HepE-clade4_10_RIGHT	2	GATGGTGGGGATGAACCTAGTG	22	54.55	60.34
HepE-clade4_11_LEFT	1	TGATATAGTCCATTGCCGCATGG	23	47.83	61.12
HepE-clade4_11_RIGHT	1	TTCTCAAACACCATGCTCGACC	22	50	61.31
HepE-clade4_12_LEFT	2	TTGCTCCCGCCCAACATATTTT	22	45.45	61.33
HepE-clade4_12_RIGHT	2	AACCACAACTCCGGCGTAGA	20	55	61.48
HepE-clade4_13_LEFT	1	GTGATTACCGCCAGAGTCGATT	22	50	60.66
HepE-clade4_13_RIGHT	1	GGCAGCATAGGCAAAAGCAC	20	55	60.48
HepE-clade4_14_LEFT	2	ACCATTATGCAGAGGTTGGAATGA	24	41.67	60.65
HepE-clade4_14_RIGHT	2	CCTGAAGCAACAGTTGAGGTCA	22	50	60.93
HepE-clade4_15_LEFT	1	TCCCGGATGTTGATTCTCGC	20	55	60.2
HepE-clade4_15_RIGHT	1	TTAACAGGGGATCCGTGAATGC	22	50	60.86
HepE-clade4_16_LEFT	2	GTAATCAAGGTTGGCGCTCTGT	22	50	61.37
HepE-clade4_16_RIGHT	2	TTGCTGTGCGTTCTCAACTGAT	22	45.45	61.25
HepE-clade4_17_LEFT	1	GCCGACAGAATTGATTTCGTCG	22	50	60.71
HepE-clade4_17_RIGHT	1	TCCCAAAAGGAGAGCTTGCC	20	55	60.27
HepE-clade4_18_LEFT	2	TCTCGGACACTGTGACATTTGT	22	45.45	60.08
HepE-clade4_18_RIGHT	2	CCCACCTTCATCTTAAGGCGTT	22	50	60.8
