# Supplementary material for: Distribution and Genetic Diversity of Hepatitis E Virus in Wild and Domestic Rabbits in Australia
Source: Pathogens. 2021 Dec 17;10(12):1637. doi: 10.3390/pathogens10121637 (PMC8709427; doi:10.3390/pathogens10121637)
Supplement: Supplementary file 1 [file pathogens-10-01637-s001.zip › pathogens-1497175-supplementary tableS3.xlsx]

## Sheet: Sheet1
	Table S3: Sequence of positive control for RT-qPCR assay
	forward primer	reverse primer	sample	Accession #	from	to	size
	clade4_1_L	clade1_1_R	BDW-2	MZ676755	10	489	479
	clade1_23_L	clade4_20_R	BDW-2	MZ676755	6673	7250	577
	clade4_1_L	clade3_1_R	BER-1	MZ676753	10	550	540
	clade3_17_L	clade3_17_R	BER-1	MZ676753	6381	6876	495
	clade4_1_L	clade2_1_R	BTY-1	MZ676754	10	452	442
	clade2_19_L	clade2_20_R	BTY-1	MZ676754	5356	6091	735
	clade4_1_L	clade1_1_R	CGW-1	MZ676760	10	489	479
	clade1_12_L	clade1_12_R	CGW-1	MZ676760	3598	3998	400
	clade1_18_L	clade2_20_R	CGW-1	MZ676760	5379	6097	718
	clade1_22_L	clade4_20_R	CGW-1	MZ676760	6536	7250	714
	clade4_1_L	CGW-34_1_R	CGW-34	MZ676761	10	598	588
	clade1_7_L	clade1_8_R	CGW-34	MZ676761	2029	2799	770
	clade3_7_L	clade2_9_R	COR-6	MZ676762	2357	2708	351
	clade4_19_L	clade3_17_R	COR-8	MZ676763	6535	6875	340
	clade4_1_L	clade2_1_R	GLO-1	MZ676764	10	492	482
	CGW-34_16_L	clade4_20_R	GRL-1	MZ676749	6761	7250	489
	clade4_1_L	clade1_1_R	HHD-2	MZ676773	10	489	479
	HUG-2_18_L	clade4_20_R	HHD-2	MZ676773	6761	7250	489
	CGW-34_12_L	HUG-2_13_R	HTL-11	MZ676765	5174	5414	240
	clade4_1_L	clade2_1_R	MTPL-3	MZ676766	10	492	482
	clade4_1_L	clade2_1_R	MTPL-6	MZ676767	10	491	481
	clade4_5_L	clade4_6_R	MTPL-6	MZ676767	1523	2416	893
	clade3_7_L	clade2_9_R	TIM-5	MZ676769	2357	2778	421
	clade4_1_L	clade3_1_R	TIM-6	MZ676770	10	548	538
	clade4_1_L	clade2_1_R	UST-4	MZ676758	10	492	482
	clade3_6_L	clade4_6_R	UST-7	MZ676759	1897	2416	519
	clade4_16_L	clade4_16_R	UST-7	MZ676759	5399	5860	461
	clade4_20_L	clade4_20_R	UST-7	MZ676759	6787	7250	463
	clade1_5_L	clade1_7_R	WA-1	MZ676774	1524	2696	1172
	clade1_23_L	clade4_20_R	WA-1	MZ676774	6676	7250	574
	clade4_1_L	clade2_1_R	WLG-1	MZ676771	10	493	483
	clade2_23_L	clade2_24_R	WLG-1	MZ676771	6565	7251	686
	clade2_8_L	clade2_9_R	ART-4	MZ676752	2143	2784	641
	clade4_16_L	clade4_15_R	ART-4	MZ676752	5401	5850	449
	clade1_18_L	clade1_20_R	CGW-1	MZ676760	5379	6258	879
	clade2_18_L	clade2_20_R	MTPL-3	MZ676766	5203	5894	691
	clade2_23_L	clade3_17_R	MTPL-6	MZ676767	6564	6971	407
	clade4_1_L	CGW-34_1_R	SRL-1	MZ676757	10	595	585
	clade1_23_L	clade3_18_R	SRL-1	MZ676757	6672	7245	573
	clade3_14_L	clade4_16_R	TIM-5	MZ676769	5155	5830	675
	clade1_19_L	clade1_19_R	WA-1	MZ676774	5660	6063	403
	clade1_21_L	clade1_22_R	WA-1	MZ676774	6252	7209	957
	clade1_18_L	clade4_16_R	WLG-1	MZ676771	5328	5858	530
	clade1_2_L	clade4_2_R	WTN-9	MZ676772	372	864	492
	clade1_16_L	clade1_16_L	WTN-9	MZ676772	4771	5162	391
	clade2_19_L	clade3_16_R	WTN-9	MZ676772	5398	6430	1032
	clade3_6_L	clade3_7_R	BER-1	MZ676753	1393	2837	1444
	CGW-34_11_L	CGW-34_11_R	CGW-34	MZ676761	4789	5293	504
	clade2_17_L	CGW-34_12_R	CGW-34	MZ676761	4884	5627	743
	clade2_22_L	clade2_24_R	MTPL-3	MZ676766	6040	6986	946
	clade2_19_L	clade2_19_R	UST-4	MZ676758	5396	5813	417
	clade3_6_L	clade4_6_R	UST-7	MZ676759	1897	2416	519
	clade2_1_L	clade2_3_R	WTN-9	MZ676772	72	1035	963
