# Supplementary material for: Distribution and Genetic Diversity of Hepatitis E Virus in Wild and Domestic Rabbits in Australia
Source: Pathogens. 2021 Dec 17;10(12):1637. doi: 10.3390/pathogens10121637 (PMC8709427; doi:10.3390/pathogens10121637)
Supplement: Supplementary file 1 [file pathogens-10-01637-s001.zip › pathogens-1497175-supplementary tableS4.xlsx]

## Sheet: Sheet1
Table S4: Primers used for subsequent Sanger sequencing
>positive control HEV RT-qPCR
GCTAGCGTTTAAACTTAAGCTTGGTACCGAGCTCGGATCCACTAGTCCAGTGTGGTGGAATTCTGCAGATATCCAGCACAGTGGCGGCCGCTCGAGTCTAGAGGGCCCGAGACCCAAGCTGTAATACGACTCACTATAGGAGACGCCCATGGGATCACCATGCGCCCTAGGGCTGTTCTGTTGTTGCTCTTCGTGCTTTTGCCTATGCTGCCCGCGCCACCGGCCGGCCAGCCGTCTGGCCGCCGTCGTGGGCGGCGCAGCGGCGGTGCCGGCGGTGGTTTCTGGGGTGACAGGGTTGATTCTCAGCCCTTCGCCCTCCCCTATATTCATCCAACCAACCCCTTCGCCGCCGATGTCGTTTCACAACCCGGGGCTGGAACTCGCCCTCGACAGCCGCCC…
